# Supplementary material for: Hydrotalcite-Embedded Magnetite Nanoparticles for Hyperthermia-Triggered Chemotherapy
Source: MDPI journal article supplement (doi:10.3390/nano11071796), 2021-07-09
Supplement: s1 [file s1]

## Supplementary Materials

# Hydrotalcite-Embedded Magnetite Nanoparticles for Hyperthermia-Triggered Chemotherapy

Konstantinos Simeonidis <sup>1,2,\*</sup>, Efthimia Kaprara <sup>1</sup>, Pilar Rivera-Gil <sup>3</sup>, Ruixue Xu <sup>3</sup>, Francisco J. Teran <sup>4,5</sup>, Evgenios Kokkinos <sup>2</sup>, Athanassios Mitropoulos <sup>6</sup>, Nikolaos Maniotis <sup>7</sup> and Lluís Balcells <sup>8</sup>

<sup>1</sup> Department of Chemical Engineering, Aristotle University of Thessaloniki, 54124 Thessaloniki, Greece;

ksime@physics.auth.gr; kaprara@auth.gr

<sup>2</sup> Ecoresources P.C., Giannitson-Santaroza Str. 15-17, 54627 Thessaloniki, Greece; kokkinos@ecoresources.gr

<sup>3</sup> Integrative Biomedical Materials and Nanomedicine Lab, Universitat Pompeu Fabra, 08003 Barcelona, Spain; pilar.rivera@upf.edu (P.R.-G.); ruixue.xu01@estudiant.upf.edu (R.X.)

<sup>4</sup> IMDEA-Nanociencia, Ciudad Universitaria de Cantoblanco, 28049 Madrid, Spain; francisco.teran@imdea.org

<sup>5</sup> Nanobiotecnología (iMdea-Nanociencia), Unidad Asociada al Centro Nacional de Biotecnología (CSIC), 28049 Madrid, Spain

<sup>6</sup> Hephaestus Advanced Laboratory, Department of Chemistry, International Hellenic University, 65404 Kavala, Greece; amitrop@chem.ihu.gr

<sup>7</sup> Department of Physics, Aristotle University of Thessaloniki, 54124 Thessaloniki, Greece; nimaniot@physics.auth.gr

<sup>8</sup> Institut de Ciència de Materials de Barcelona, CSIC, 08193 Bellaterra, Spain; balcells@icmab.es

\* Correspondence: ksime@physics.auth.gr

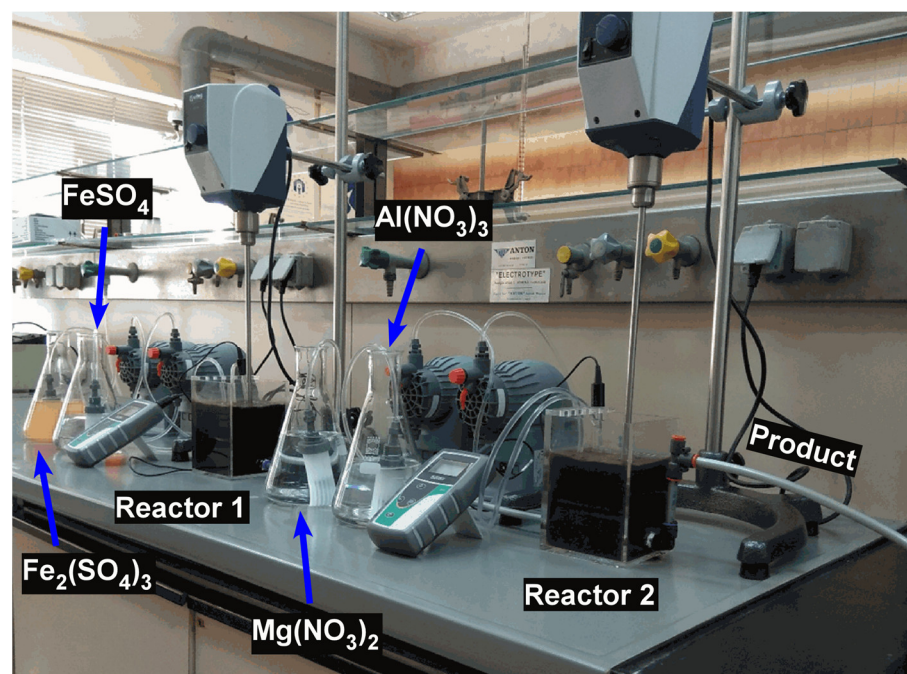

**Figure S1.** Laboratory setup for the continuous-flow production of the hydrotalcite/magnetite nanocomposites.

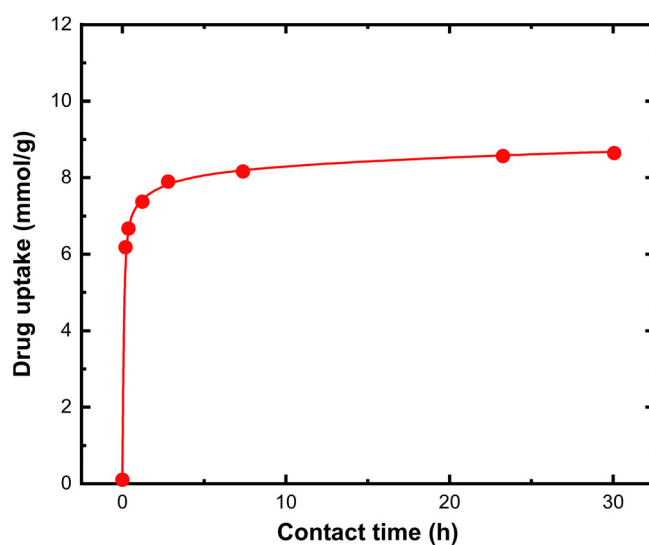

**Figure S2.** Kinetic of drug loading in the structure of the MGT-35. Experiment was performed in a phosphate-buffered saline (PBS) solution adjusted to pH 9 with 0.5 mM of 5-fluorouracil and 2 g/L of dispersed nanomaterial.

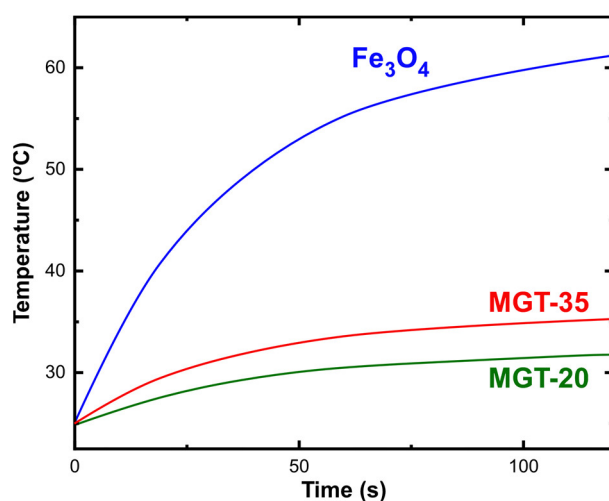

**Figure S3.** Temperature increase during AC field application (strength 24 kA/m, frequency 765 kHz) on an aqueous dispersion (2 g/L) of MGT-20 and MGT-35, and a corresponding Fe<sub>3</sub>O<sub>4</sub> nanoparticles reference sample.

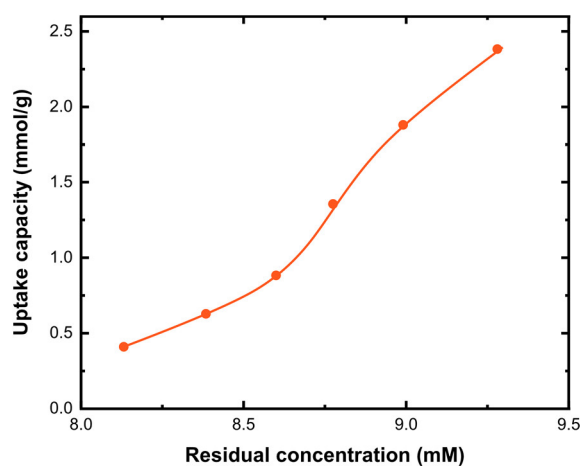

**Figure S4.** Uptake capacity versus residual 5-fluorouracil concentration for Magnother-35. Experiments were carried out in a phosphate-buffered saline (PBS) solution adjusted to pH 9.

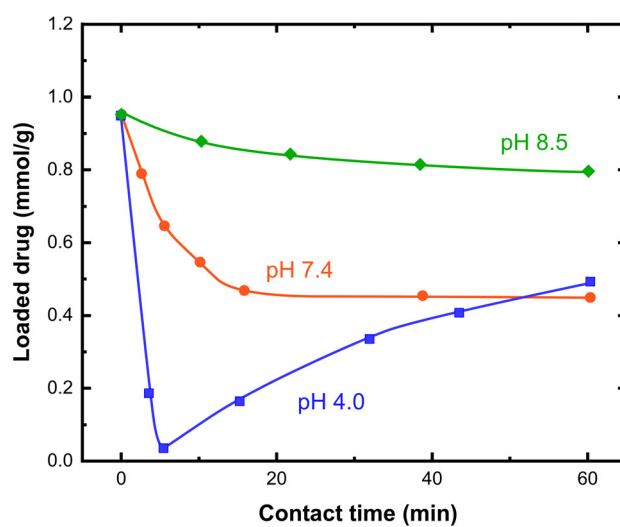

**Figure S5.** Time dependent leaching behavior of 5-fluorouracil from initially loaded MGT-35 (~1 mmol/g) dispersed in a phosphate-buffered saline (PBS) solution adjusted to various pH values.

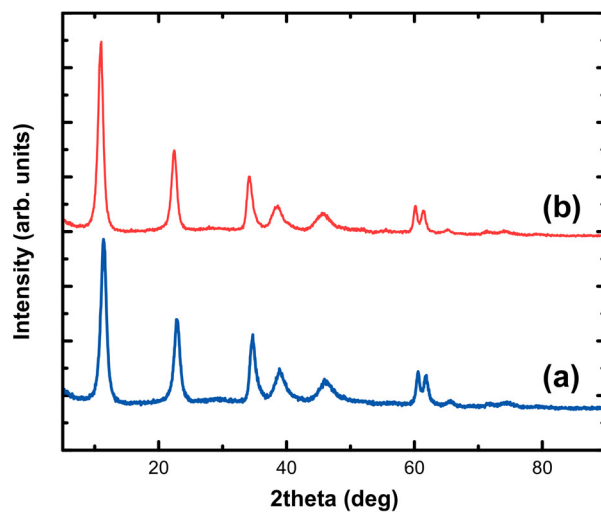

**Figure S6.** XRD diagrams of pure hydrotalcite before (a) and after loading with 5-fluorouracil (b).

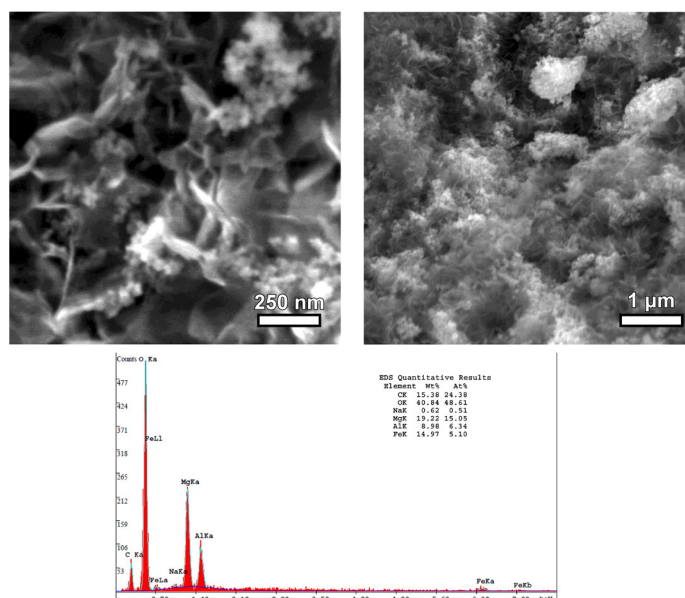

**Figure S7.** Scanning electron microscopy images and elemental analysis of sample MGT-35.
